# Supplementary material for: Water dissociation on K2O-pre-adsorbed transition metals: a systematic theoretical study
Source: Royal Society of Chemistry journal article supplement (doi:10.1039/c8cp03587c), 2018-01-01
Supplement: c8cp03587c1.pdf [file c8cp03587c1.pdf]

## Supporting information

### **Water dissociation on clean and potassium pre-adsorbed transition metals: A systematic theoretical study**

Yan-Xin Wang<sup>1</sup>, Gui-Chang Wang<sup>\*,1,2</sup>

(<sup>1</sup>Key Laboratory of Advanced Energy Materials Chemistry (Ministry of Education) and the Tianjin key Lab and Molecule-based Material Chemistry, College of Chemistry, Nankai University, Tianjin 300071, P. R. China; <sup>2</sup>State Key Laboratory of Coal Conversion, Institute of Coal Chemistry, Chinese Academy of Sciences, Taiyuan, 030001, P. R. China)

\*Corresponding author: Gui-Chang Wang. E-mail: wangguichang@nankai.edu.cn

Telephone: +86-22-23503824 (O) Fax: +86-22-23502458

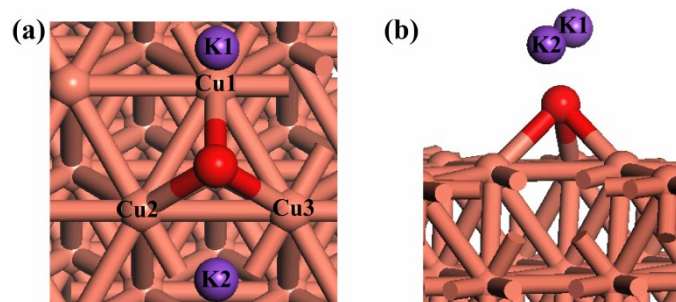

**Fig. S1** Top (left) and side (right) views of optimized structures of  $K_2O$  adsorption on Cu(111) surface. The light red, purple and red balls represent the Cu, K and O atoms, respectively.

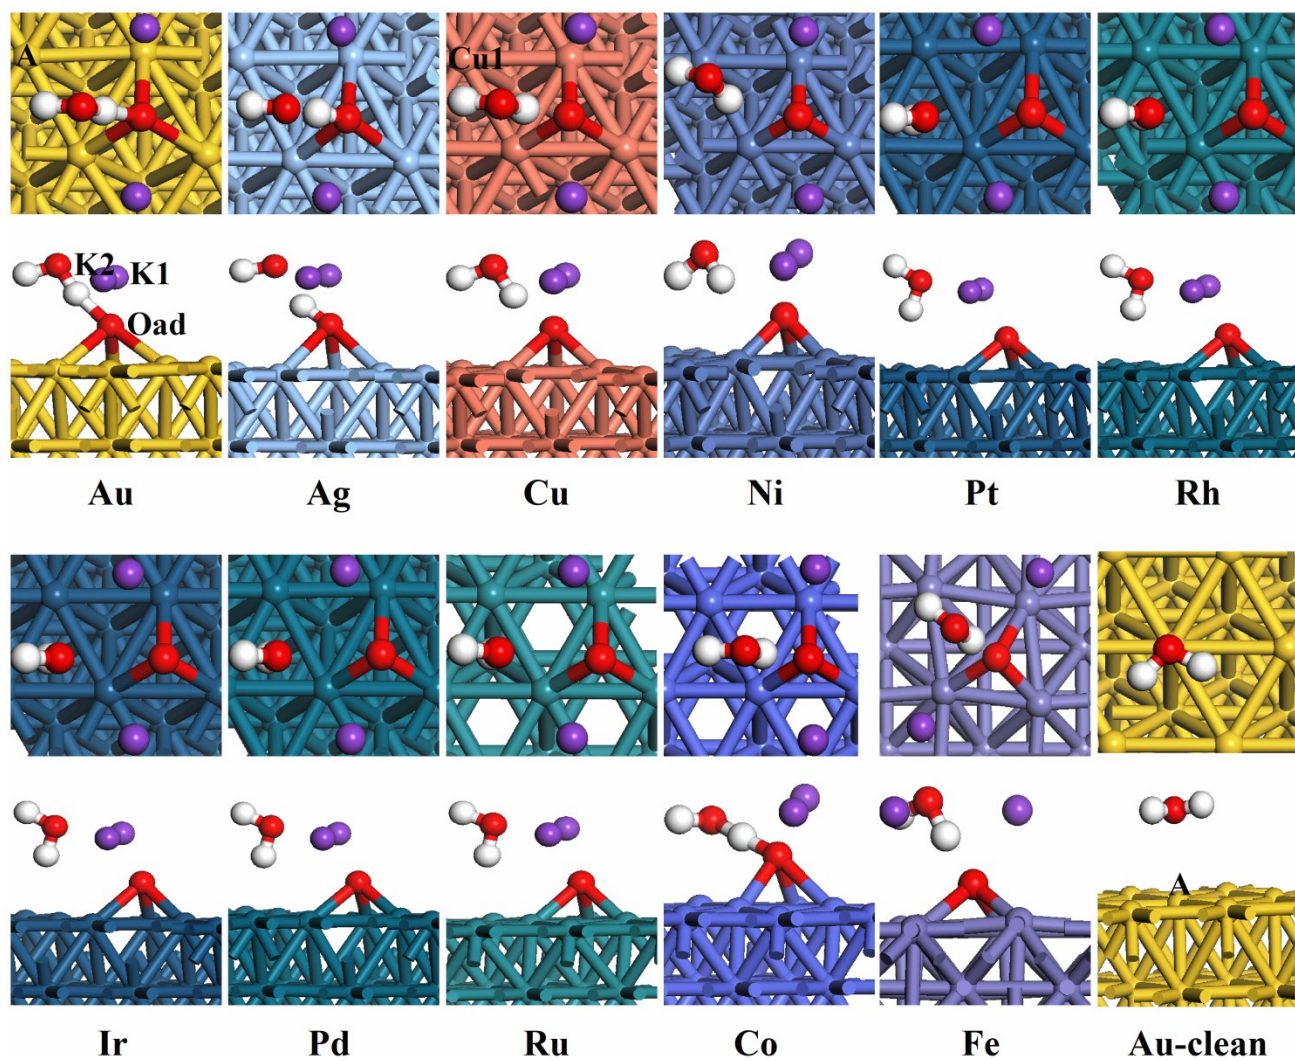

**Fig. S2** Top and side view of optimized structures for  $\text{H}_2\text{O}$  adsorption on various metal surfaces. The purple, red and white balls represent the K, O and H atoms, respectively.

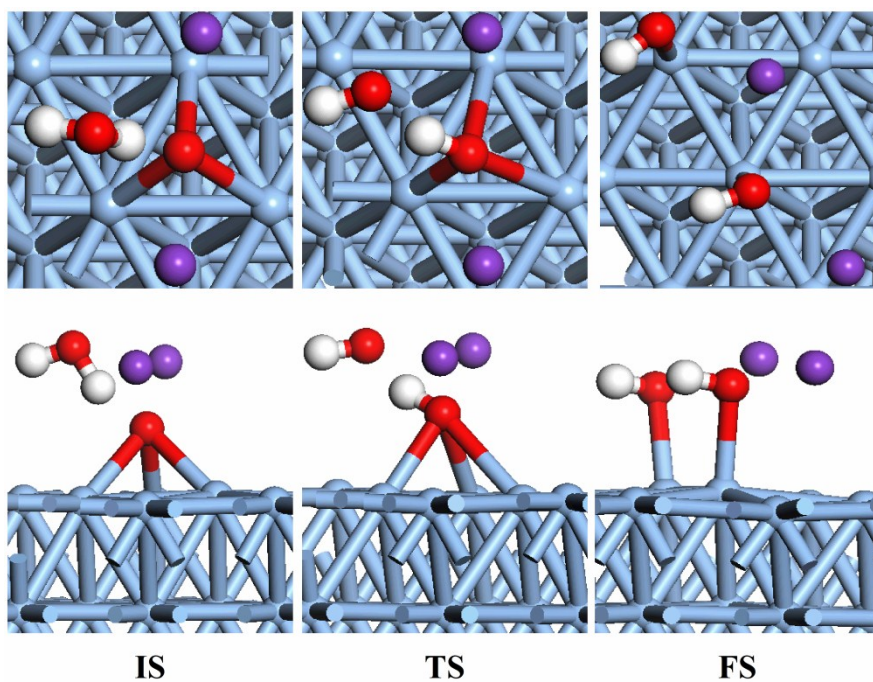

**Fig. S3** Top and side view of the initial (IS), transition (TS) and final state (FS) for H<sub>2</sub>O dissociation on K<sub>2</sub>O-pre-adsorbed Ag(111) surface. The blue, purple, red and white balls represent the Ag, K, O and H atoms, respectively.

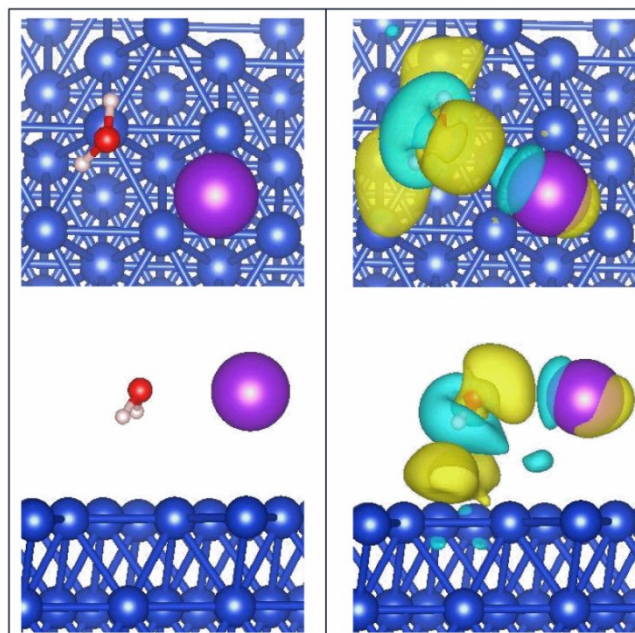

**Fig. S4** (a) Top and side views of stable H<sub>2</sub>O adsorption structures on K-pre-adsorbed Cu(111) surface and (b) Charge density difference map for H<sub>2</sub>O adsorption on K-pre-adsorbed Cu(111) surface. (blue: Cu; red: O; white: H; Purple: K). The yellow and cyan isosurfaces stand for the accumulation of electron density and the depletion of electron density, respectively.

**Table S1** Adsorption energies and geometry parameters of K<sub>2</sub>O on different metal surfaces

|    | E <sub>ads</sub> | d <sub>O-M1</sub> | d <sub>O-M2</sub> | d <sub>O-M3</sub> | d <sub>O-M4</sub> | d <sub>O-K1</sub> | d <sub>O-K2</sub> | d <sub>K1-M</sub> | d <sub>K2-M</sub> |
|----|------------------|-------------------|-------------------|-------------------|-------------------|-------------------|-------------------|-------------------|-------------------|
| Au | -2.92            | 2.450             | 2.292             | 2.289             | -                 | 2.553             | 2.519             | 2.846             | 2.770             |
| Ag | -2.63            | 2.389             | 2.323             | 2.317             | -                 | 2.496             | 2.479             | 2.919             | 2.841             |
| Cu | -3.47            | 2.052             | 2.026             | 2.026             | -                 | 2.541             | 2.491             | 2.911             | 2.920             |
| Ni | -4.45            | 1.898             | 1.889             | 1.890             | -                 | 2.667             | 2.600             | 2.739             | 2.707             |
| Pt | -4.29            | 2.146             | 2.133             | 2.134             | -                 | 3.038             | 2.626             | 2.805             | 2.785             |
| Rh | -4.64            | 2.089             | 2.107             | 2.106             | -                 | 2.758             | 2.572             | 2.848             | 2.863             |
| Ir | -4.49            | 2.138             | 2.151             | 2.151             | -                 | 2.826             | 2.582             | 2.938             | 2.942             |
| Pd | -4.38            | 2.102             | 2.099             | 2.097             | -                 | 2.761             | 2.611             | 2.817             | 2.804             |
| Ru | -5.04            | 2.096             | 2.105             | 2.103             | -                 | 2.770             | 2.621             | 2.997             | 2.984             |
| Co | -4.51            | 1.958             | 1.957             | 1.957             | -                 | 2.634             | 2.570             | 2.986             | 2.973             |
| Fe | -4.32            | 2.158             | 2.100             | 2.11              | 2.104             | 2.930             | 2.892             | 2.886             | 2.875             |

**Table S2** Bader charges of O and K atoms at ISs for various clean, K-pre-adsorbed and K<sub>2</sub>O-pre-adsorbed metal surfaces

| metal | K <sub>2</sub> O/M |      |      | K/M <sup>44</sup> |      | clean <sup>44</sup> |
|-------|--------------------|------|------|-------------------|------|---------------------|
|       | O/e                | K1/e | K2/e | O/e               | K/e  | O/e                 |
| Au    | -2.10              | 0.86 | 0.85 | -2.04             | 0.88 | -1.97               |
| Ag    | -1.78              | 0.85 | 0.85 | -2.07             | 0.85 | -1.99               |
| Cu    | -2.12              | 0.81 | 0.81 | -2.09             | 0.85 | -1.98               |
| Ni    | -2.14              | 0.80 | 0.80 | -2.10             | 0.90 | -1.98               |
| Pt    | -2.08              | 0.84 | 0.84 | -2.04             | 0.87 | -1.92               |
| Rh    | -2.12              | 0.82 | 0.82 | -2.08             | 0.85 | -1.94               |
| Ir    | -2.09              | 0.83 | 0.83 | -2.05             | 0.86 | -1.93               |
| Pd    | -2.10              | 0.82 | 0.82 | -2.07             | 0.86 | -1.95               |
| Ru    | -2.13              | 0.82 | 0.82 | -2.09             | 0.85 | -1.99               |
| Co    | -2.11              | 0.79 | 0.79 | -2.11             | 0.84 | -1.99               |
| Fe    | -2.12              | 0.79 | 0.80 | -2.13             | 0.82 | -2.03               |

**Table S3** Bader charges of OH and H atoms at TSs for various clean, K-pre-adsorbed and K<sub>2</sub>O-pre-adsorbed metal surfaces<sup>a</sup>

|        | Au    | Ag    | Cu    | Ni    | Pt    | Rh    | Ir    | Pd    | Ru    | Co    | Fe    |
|--------|-------|-------|-------|-------|-------|-------|-------|-------|-------|-------|-------|
| OH/e   | -0.4  | -0.5  | -0.47 | -0.45 | -0.37 | -0.4  | -0.39 | -0.38 | -0.48 | -0.45 | -0.52 |
| H/e    | +0.11 | -0.02 | -0.01 | 0     | +0.18 | +0.14 | +0.14 | +0.13 | +0.04 | -0.01 | 0     |
| K/OH/e | -0.59 | -0.63 | -0.62 | -0.59 | -0.5  | -0.55 | -0.54 | -0.53 | -0.59 | -0.60 | -0.64 |

---

|                       |       |       |       |       |       |       |       |       |       |       |       |
|-----------------------|-------|-------|-------|-------|-------|-------|-------|-------|-------|-------|-------|
| K/H/e                 | +0.12 | +0.08 | 0     | +0.08 | +0.23 | +0.15 | +0.20 | +0.13 | +0.06 | +0.04 | +0.03 |
| K <sub>2</sub> O/OH/e | -0.72 | -     | -0.75 | -0.77 | -1.07 | -0.69 | -1.05 | -0.63 | -1.1  | -0.75 | -1.14 |
| K <sub>2</sub> O/H/e  | +1    | -     | +0.6  | +0.61 | +1    | +0.61 | +1    | +1    | +1    | +0.61 | +1    |

---

<sup>a</sup> The Bader charges of OH and H atoms at TSs for various clean, K-pre-adsorbed metal surfaces stem from our previous results.<sup>43</sup>
